# Supplementary material
Source: publisher figshare collection journal article supplement (https://gsapubs.figshare.com/ndownloader/files/39625438)
Supplement: Supplementary file 1 [file 39625438]

## Sheet: Sheet1
DR-Table 4: Hf isotopic data of eclogite zircons.
No.	Age (Ma)	176Yb/177Hf		176Lu/177Hf		176Hf/177Hf		eHf(t)	eHf(t)'	2σ	TDM (Ma)	TDMC (Ma)	fLu/Hf
Sample	U-Pb age	176Yb/177Hf(corr)	2σ	176Lu/177Hf(corr)	2σ	176Hf/177Hf(corr)	2σ
GJ-1-1		0.00915023	1.95186e-05	0.000337767	2.195e-07	0.282007	1.65206e-05
SA52A-1	256	0.00858834	5.50035e-05	0.000364503	8.1144e-07	0.282958	1.50672e-05	12.1275	12.6607	0.533139	410.631	506.651	-0.989021
SA52A-17	241	0.00577715	2.64322e-05	0.000249074	3.63691e-07	0.282968	1.61553e-05	12.1791	12.7508	0.571621	395.196	491.704	-0.992498
SA52A-2	241	0.00907149	5.76126e-05	0.000378435	1.32591e-06	0.282931	1.79199e-05	10.8586	11.4927	0.63406	447.939	576.318	-0.988601
SA52A-21	241	0.0627034	0.000900043	0.0027775	4.25287e-05	0.282986	1.56289e-05	12.4198	12.9728	0.552995	395.961	476.256	-0.91634
SA52A-23	256	0.00955158	4.56351e-05	0.000399189	2.57704e-06	0.282963	1.57567e-05	12.3273	12.8848	0.557535	402.868	493.851	-0.987976
GJ-1-2		0.00914184	2.74695e-05	0.00033623	2.19732e-07	0.281988	1.74496e-05
SA52A-24	256	0.0282449	0.000397863	0.0012579	1.887e-05	0.283015	1.53342e-05	14.0176	14.5602	0.542586	337.772	385.438	-0.962112
SA52A-4	256	0.00566526	1.76026e-05	0.000238731	3.41079e-07	0.282945	1.5115e-05	11.7162	12.2511	0.53483	426.329	533.009	-0.992809
SA52A-5	277	0.013607	9.59088e-05	0.000663161	7.55891e-06	0.282963	1.66626e-05	12.7223	13.3119	0.589618	406.234	484.839	-0.980025
SA52A-8	241	0.00672521	3.03078e-05	0.000290386	7.40569e-07	0.282975	1.62038e-05	12.4267	13	0.573337	385.59	475.832	-0.991253
SA53A-13	251	0.010335	0.000209518	0.000454686	1.11184e-05	0.282949	1.66228e-05	11.6995	12.2876	0.588175	423.655	530.203	-0.986305
GJ-1-3		0.0090657	1.797e-05	0.000335623	2.54811e-07	0.281991	1.33212e-05
SA53A-14	250	0.00657902	8.35093e-05	0.000286593	2.38117e-06	0.282935	1.66461e-05	11.2205	11.8095	0.589001	440.924	560.114	-0.991368
SA53A-15	195	0.00561124	2.10126e-05	0.000242817	3.96523e-07	0.282964	2.00211e-05	11.035	11.7433	0.708333	400.632	529.388	-0.992686
SA53A-16	194	0.00437361	3.76488e-05	0.000215658	8.38831e-07	0.282936	1.94954e-05	10.0304	10.7201	0.689734	439.187	592.994	-0.993504
SA53A-20	196	0.00776089	9.30711e-05	0.000354667	3.51928e-06	0.282968	1.36292e-05	11.1739	11.6561	0.482191	396.605	521.257	-0.989317
SA53A-24	250	0.00536829	1.40903e-05	0.000235218	7.58322e-07	0.282963	1.80023e-05	12.1967	12.8337	0.636986	402.209	497.564	-0.992915
GJ-1-4		0.00896634	2.62664e-05	0.000325433	2.04383e-07	0.281993	1.58459e-05
SA53A-25	250	0.00620987	0.000102264	0.000290205	3.7979e-06	0.282985	1.7091e-05	12.964	13.5687	0.604741	372.137	448.367	-0.991259
SA53A-3	251	0.00638129	4.33503e-05	0.000278136	2.89629e-06	0.283	1.71239e-05	13.549	14.1549	0.605905	349.863	411.616	-0.991622
SA55A-21	286	0.0148671	0.000643518	0.000529237	2.41692e-05	0.283008	1.61797e-05	14.5445	15.1171	0.572541	341.134	374.984	-0.984059
SA55A-23	286	0.0550668	9.15911e-05	0.00195548	5.53762e-06	0.282992	1.71195e-05	13.7105	14.3163	0.605797	377.737	428.484	-0.9411
SA55A-25	243	0.0344228	0.000175409	0.00119645	2.32699e-06	0.28296	1.64524e-05	11.7969	12.379	0.582137	416.286	517.749	-0.963962
GJ-1-5		0.00884997	2.47985e-05	0.000323302	2.25593e-07	0.281987	1.36415e-05
SA55A-27	288	0.0618513	0.000321754	0.00196972	3.11205e-06	0.282964	1.85341e-05	12.754	13.4099	0.65586	418.973	491.345	-0.940671
SA55A-3	281	0.00147888	5.29056e-05	5.19102e-05	1.65946e-06	0.28309	1.11804e-05	17.4066	17.8022	0.395629	223.623	187.229	-0.998436
SA55A-5	280	0.0029341	2.76624e-05	0.000121793	1.05049e-06	0.283063	1.77475e-05	16.4383	17.0663	0.628012	260.811	248.697	-0.996332
SA55A-9	241	0.00475878	3.61e-05	0.000229064	1.40016e-06	0.282942	1.64863e-05	11.2667	11.8501	0.583334	431.06	550.177	-0.9931
SA56A-11	267	0.00207984	1.1233e-05	8.50873e-05	5.22071e-07	0.282709	1.70346e-05	3.6294	4.23216	0.602769	751.441	1058.03	-0.997437
GJ-1-6		0.00869406	2.40873e-05	0.00032041	2.19473e-07	0.281967	1.39722e-05
SA56A-13	262	0.000319037	6.76564e-06	8.34832e-06	3.03205e-07	0.282569	1.7624e-05	-1.44255	-0.818935	0.623616	943.254	1376.62	-0.999749
SA56A-14	230	0.00320954	0.000292764	0.000129645	1.27796e-05	0.282853	1.65345e-05	7.90531	8.49033	0.585023	552.988	756.783	-0.996095
SA56A-21	92	0.000734002	5.72134e-06	2.12986e-05	1.96378e-07	0.282849	1.70102e-05	4.74585	5.34752	0.601673	557.065	852.653	-0.999358
SA56A-23	89	0.000490463	3.986e-06	1.42962e-05	2.0103e-07	0.282866	1.78443e-05	5.27297	5.90415	0.631174	533.801	816.643	-0.999569
SA56A-24	234	0.00902933	8.36687e-05	0.000427078	5.21617e-06	0.282889	1.87929e-05	9.21332	9.87826	0.664938	507.26	676.216	-0.987136
GJ-1-7		0.00864343	2.09169e-05	0.000320259	2.36171e-07	0.281997	1.48053e-05
SA56A-25	91	0.000377143	4.17191e-06	1.07132e-05	1.63808e-07	0.282881	1.60114e-05	5.84119	6.40753	0.566343	513.256	781.826	-0.999677
SA56A-5	229	0.00149307	2.52099e-05	5.7832e-05	7.24848e-07	0.28273	1.75408e-05	3.52409	4.14472	0.620628	722.643	1035.63	-0.998258
SA56A-6	93	0.000862418	8.24184e-06	2.67212e-05	3.42062e-07	0.28284	1.5325e-05	4.4506	4.99267	0.542067	569.529	872.293	-0.999195
SA56A-8	91	0.00048859	4.21547e-06	1.53135e-05	1.6727e-07	0.282855	1.68664e-05	4.94693	5.54351	0.596585	548.275	839.029	-0.999539
SA57A-11	275	0.0466808	0.000623096	0.00172459	1.96333e-05	0.282473	1.30217e-05	-4.85001	-4.38922	0.460782	1123.97	1601.96	-0.948055
GJ-1-8		0.00890475	1.02051e-05	0.000340157	2.39786e-07	0.281975	1.43647e-05
SA57A-13	291	0.0567036	0.000395404	0.00193199	7.02545e-06	0.28245	1.44588e-05	-5.35828	-4.84663	0.51165	1162.93	1646.13	-0.941808
SA57A-14	276	0.0438057	0.000222877	0.00153748	2.43081e-06	0.282473	1.42386e-05	-4.78071	-4.27687	0.50384	1117.75	1598.38	-0.95369
SA57A-17	243	0.0276978	0.000209626	0.00103534	6.95883e-06	0.282497	1.6384e-05	-4.57607	-3.99636	0.579715	1070.43	1560.59	-0.968815
SA57A-3	277	0.0662023	0.000128148	0.0023621	5.45328e-06	0.282454	1.49045e-05	-5.60805	-5.08064	0.527407	1171.74	1651.2	-0.928852
SA57A-4	244	0.0444733	0.000289994	0.00161547	1.22218e-05	0.282514	1.53072e-05	-4.04143	-3.49981	0.541617	1062.64	1527.35	-0.951341
GJ-1-9		0.00923204	2.79194e-05	0.000324981	2.06219e-07	0.28202	1.48923e-05
SA57A-6	266	0.0412984	0.00100918	0.00144245	2.82981e-05	0.282489	1.47712e-05	-4.44276	-3.92008	0.522678	1093.57	1569.46	-0.956553
SA57A-7	267	0.051333	0.000167332	0.00188068	5.96207e-06	0.282489	1.35617e-05	-4.4767	-3.99682	0.479881	1105.65	1572.25	-0.943353
SA57A-9	274	0.0563369	0.000488081	0.001835	1.40529e-05	0.282517	1.13202e-05	-3.3215	-2.92093	0.400569	1063.61	1504.46	-0.944729
